# Supplementary material for: Transparent flexible lithium ion conducting solid polymer electrolyte
Source: Royal Society of Chemistry journal article supplement (doi:10.1039/c7ta02182h), 2017-01-01
Supplement: c7ta02182h1.pdf [file c7ta02182h1.pdf]

# Transparent Flexible Lithium Ion Conducting Solid Polymer Electrolyte

Anand B. Puthirath,<sup>a</sup> Sudeshna Patra,<sup>a</sup> Shubhadeep Pal,<sup>a</sup> Manoj M<sup>b</sup>, P.B. Aravind,<sup>b</sup>

S. Jayalekshmi,<sup>b</sup> and Tharangattu N. Narayanan<sup>a\*</sup>

<sup>a</sup>TIFR- Center for Interdisciplinary Sciences (TCIS),  
Tata Institute of Fundamental Research, Hyderabad - 500075 India.

<sup>b</sup>Department of Physics, Cochin University of Science and Technology, Kerala - 682022 India.

\*E-mail: [tnn@tifrh.res.in](mailto:tnn@tifrh.res.in) or [tn\\_narayanan@yahoo.com](mailto:tn_narayanan@yahoo.com) (T.N.N.)

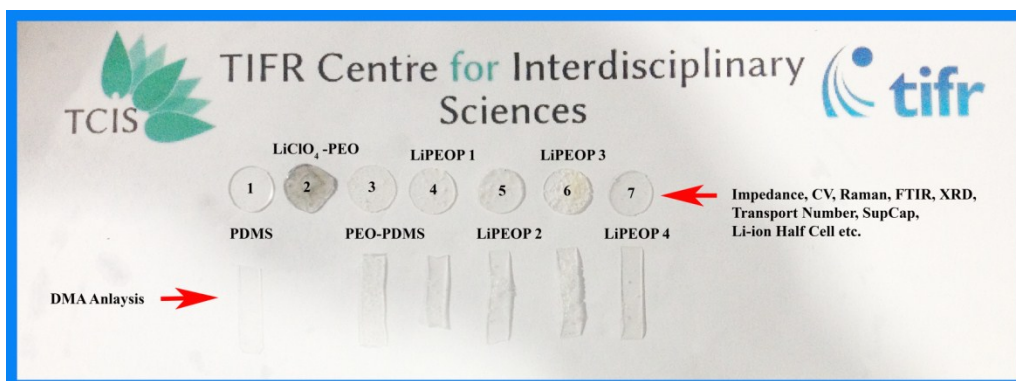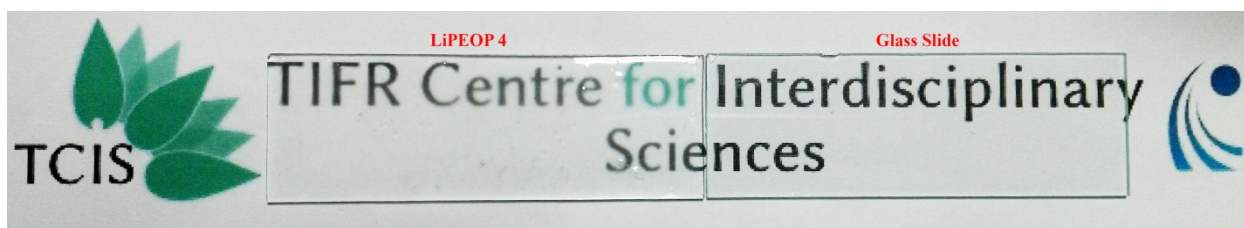

Figure S1. Snaps of the samples used for various measurements.

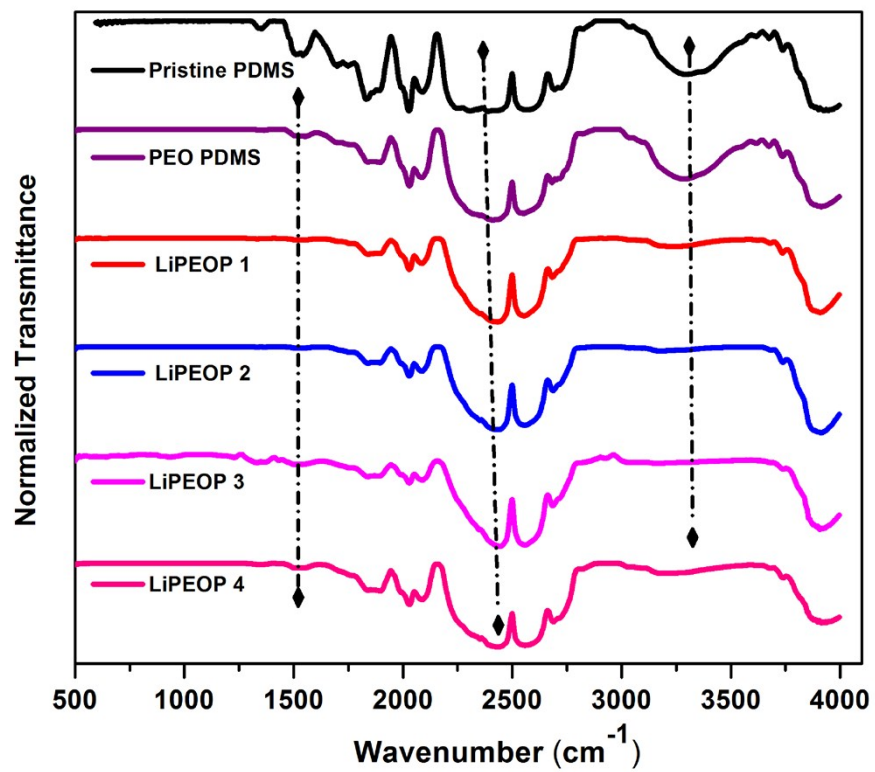

Figure S2. FTIR spectra of various samples.

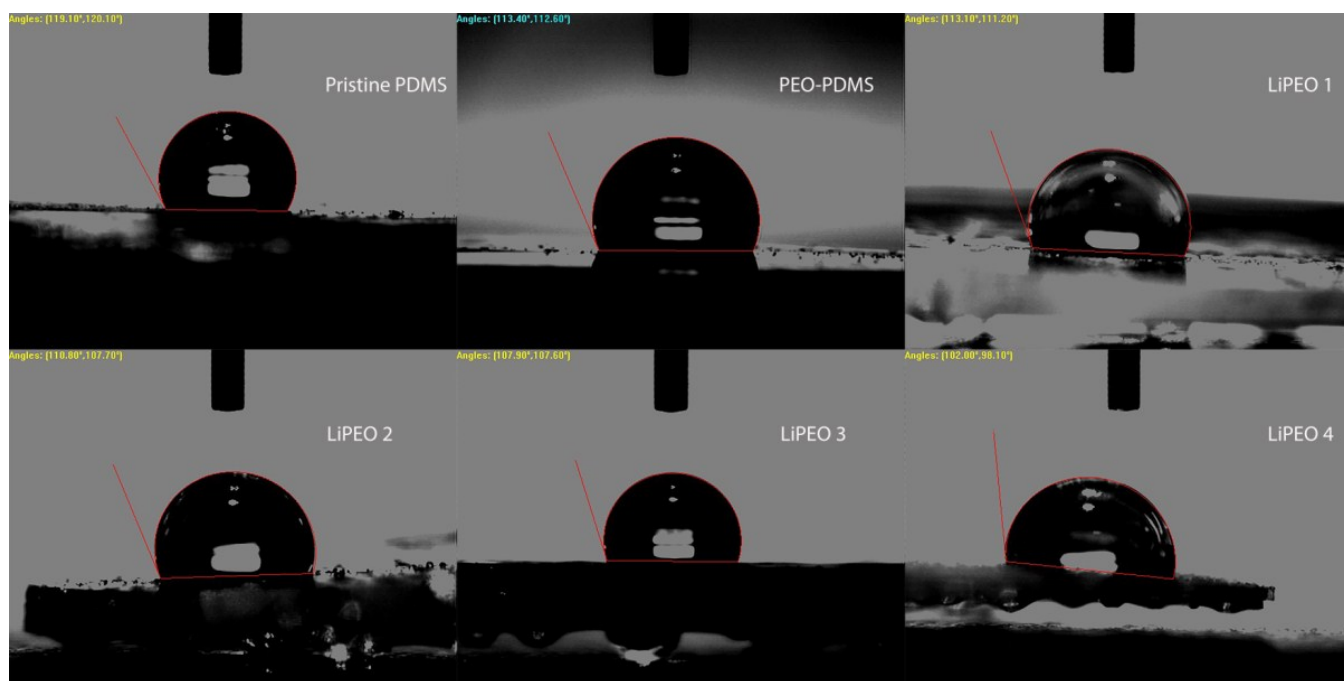

Figure S3. Water contact angles of various samples.

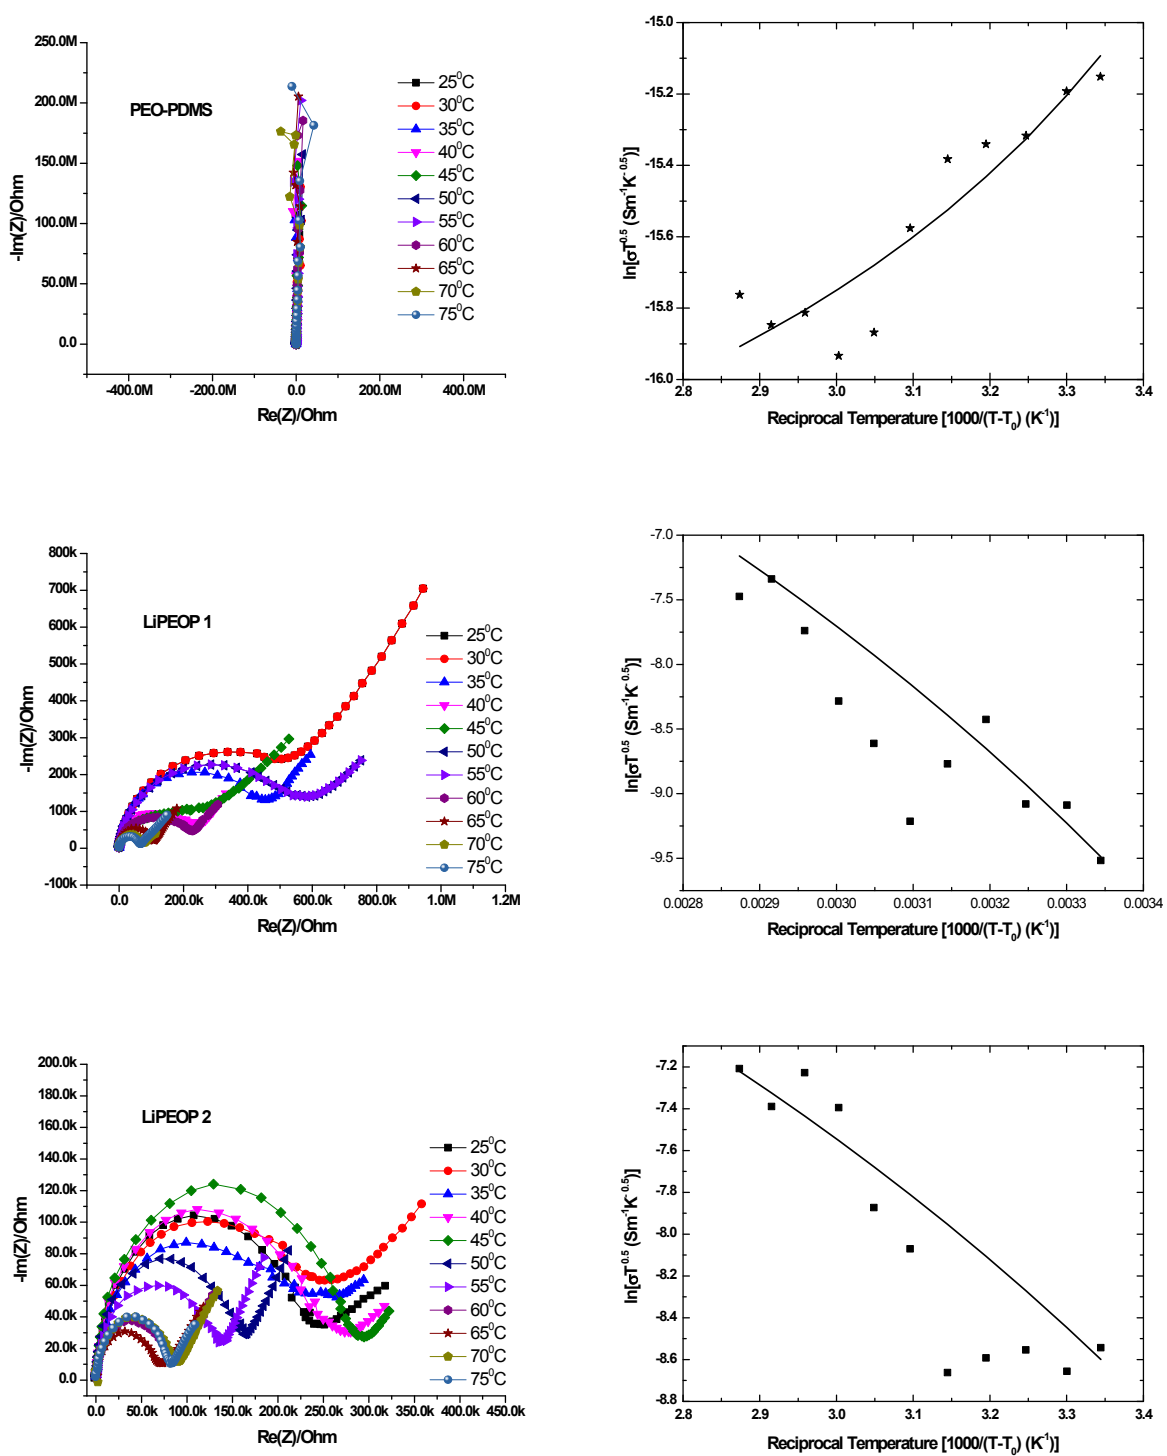

Figure S4. Temperature Dependent Nyquist's Plots and VTF Plots of PEO-PDMS, LiPEOP 1 and 2

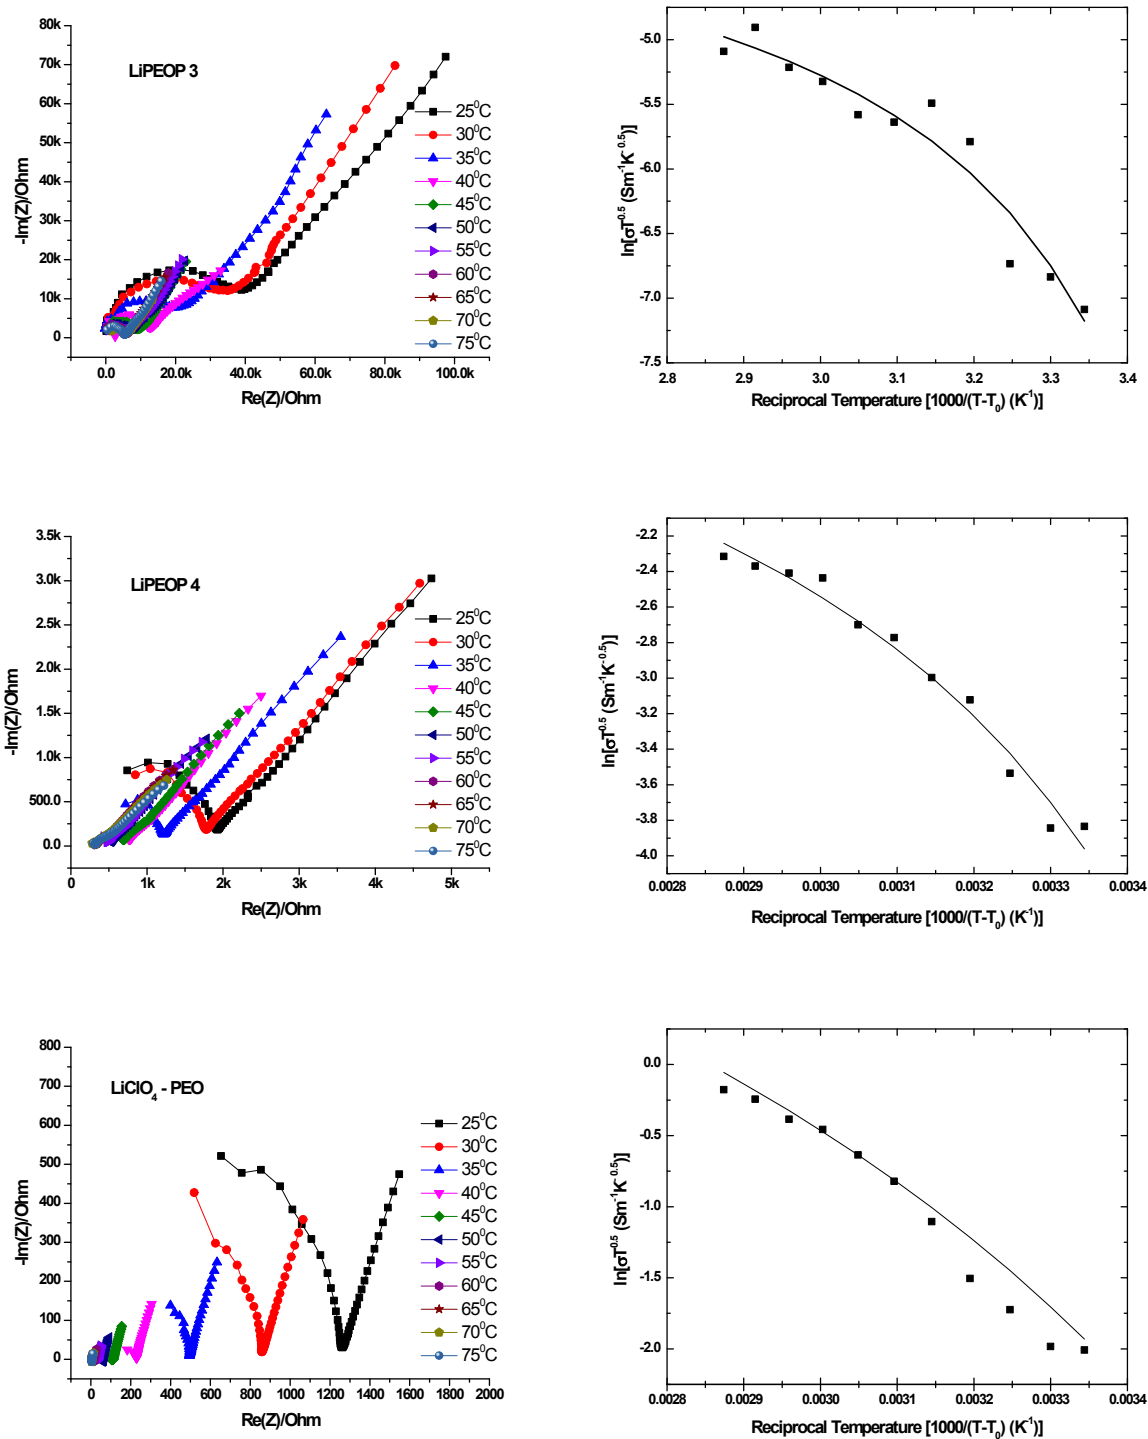

**Figure S5.** Temperature Dependent Nyquist's Plots and VTF Plots of LiPEOP 3 and 4 and LiClO<sub>4</sub>-PEO

## Supercapacitor – Capacitance Calculation

$$C = 2 * \left( \frac{I}{\frac{dv}{dt}} \times M \right)$$

$\frac{dv}{dt}$

= Calculated from the slope of Discharge curve after the IR drop

$I$  = Constant current used for charging and discharging

$M$  = Weight of active electrode material in one of the electrode

Reference:

1. Bihag Anothumakkool, Siddheshwar N. Bhange, Sreekuttan M. Unniand Sreekumar Kurungot, 1-Dimensional confinement of porous polyethylenedioxythiophene using carbon nanofibers as a solid template: an efficient charge storage material with improved capacitance retention and cycle stability, *RSC Adv.*, 3, 11877-11887 (2013)

## Thickness Dependent Ion conductivity variation – LiPEOP 4

### Nyquist Impedance curves of the three samples

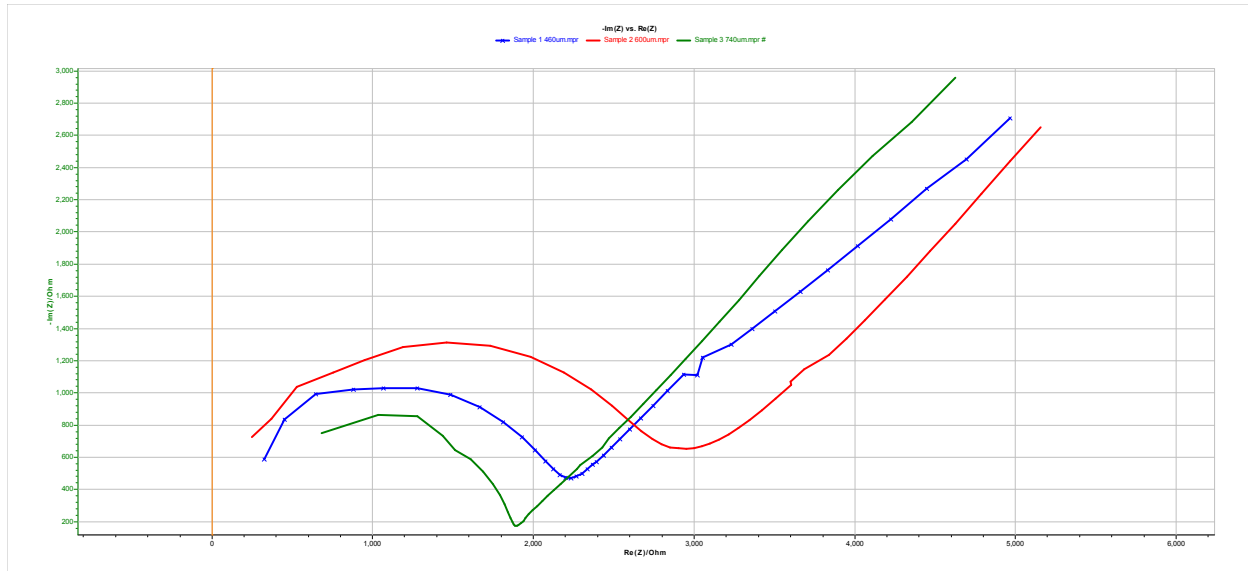

**Figure S7:** Variation of Conductivity of LiPEOP 4 with thickness – Nyquist Plots

| Thickness - $l$ ( $\mu\text{m}$ ) | Area - $A$ ( $\text{m}^2$ ) | Bulk Resistance - $R_b$ ( $\Omega$ ) | Conductivity - $\sigma$ (S/m) |
|-----------------------------------|-----------------------------|--------------------------------------|-------------------------------|
| 460                               | $1.13 \times 10^{-4}$       | 1909.68                              | $1.57 \times 10^{-3}$         |
| 600                               | $1.13 \times 10^{-4}$       | 2699.86                              | $1.55 \times 10^{-3}$         |
| 740                               | $1.13 \times 10^{-4}$       | 1550.00                              | $2.98 \times 10^{-3}$         |

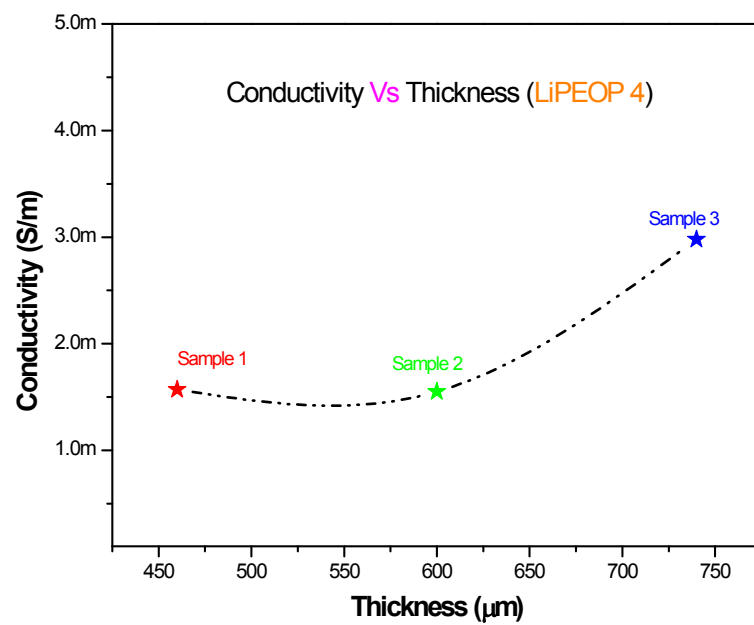

Figure S6: Variation of Conductivity with thickness
